# Supplementary material
Source: PubMed Central journal article supplement (PMC4419278)
Supplement: supp_dev.120238_DEV120238supp.pdf [file supp_dev.120238_DEV120238supp.pdf]

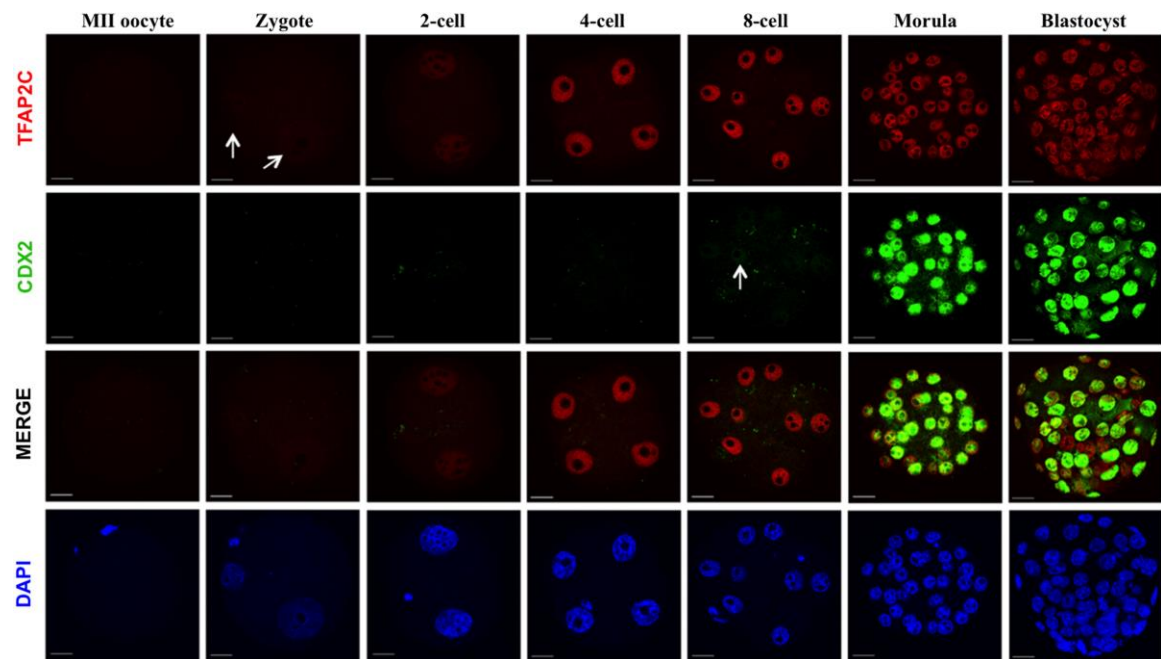

**Fig. S1. TFAP2C expression precedes and overlaps CDX2 in preimplantation embryos.**

Immunofluorescence analysis of TFAP2C and CDX2 during mouse preimplantation development. TFAP2C protein first appeared at the 1-cell stage, while CDX2 protein first appeared at the 8-cell stage. Nuclei were counterstained with DAPI. Scale bars = 20  $\mu$ m. A total of two biological replicates were performed.

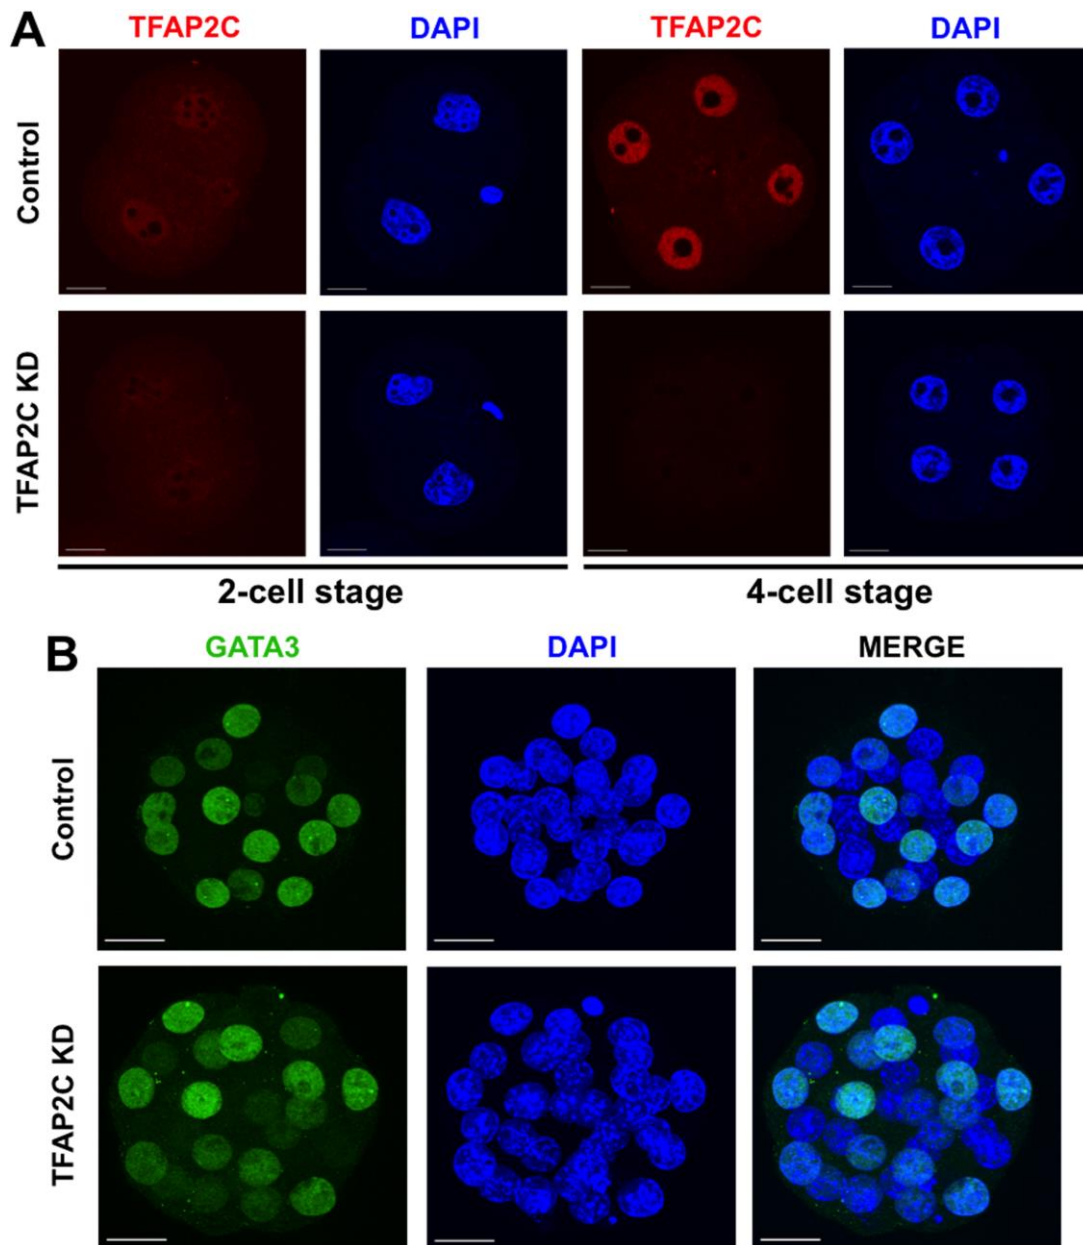

**Fig. S2. Temporal reduction in TFAP2C protein following microinjection of *Tfap2c* siRNA and GATA3 expression in TFAP2C KD morulae.**

(A) Immunofluorescence analysis of TFAP2C protein in 2-cell and 4-cell embryos from zygotes microinjected with *Tfap2c* siRNA. TFAP2C protein was strongly downregulated by the 4-cell stage. (B) Evaluation of GATA3 protein in TFAP2C KD and control morulae. GATA3 was unchanged in TFAP2C KD embryos. Nuclei were counterstained with DAPI. Scale bars = 20  $\mu$ m. A total of two biological replicates were performed.

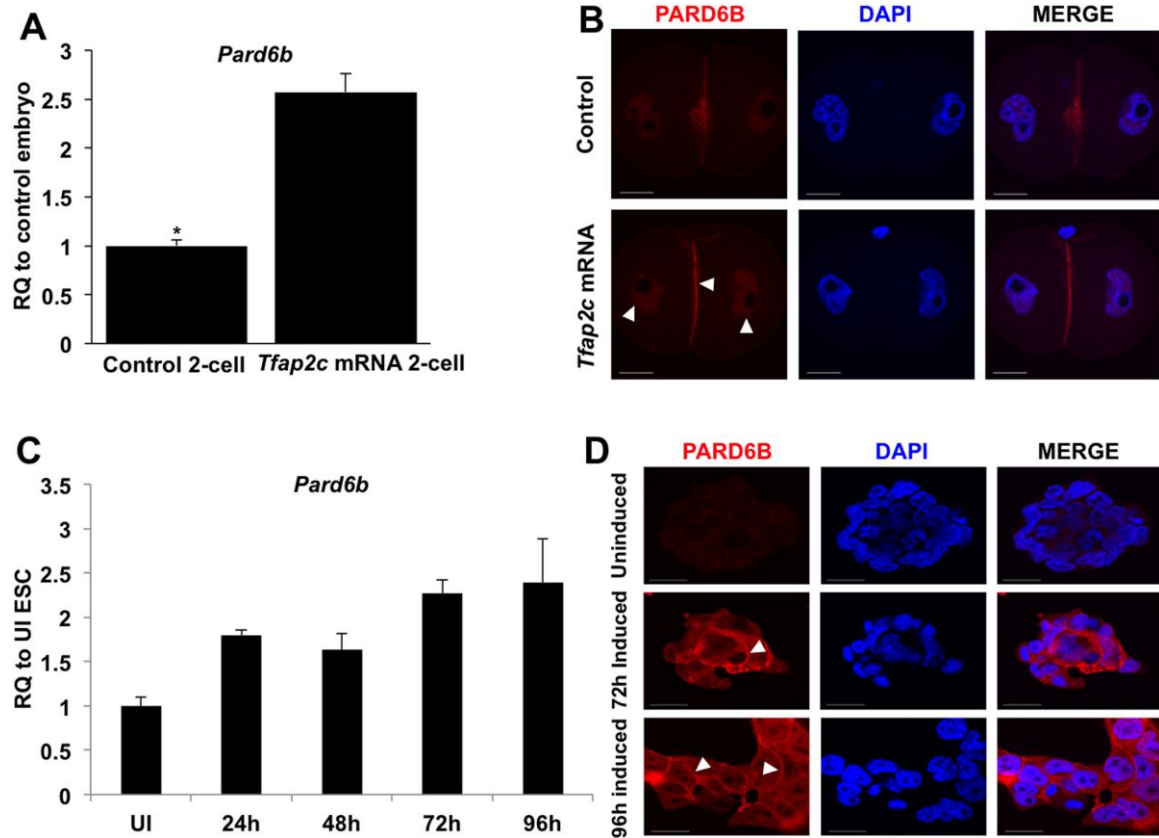

**Fig. S3. Overexpression of TFAP2C induces *Pard6b* mRNA and protein during early development.**

(A) Real-time qPCR analysis of *Pard6b* expression in 2-cell embryos from zygotes microinjected with 25ng/ $\mu$ l of *Tfap2c* mRNA. (B) Immunofluorescence analysis of PARD6B in 2-cell embryos from zygotes microinjected with 25ng/ $\mu$ l of *Tfap2c* mRNA. Nuclei were counterstained with DAPI. Scale bars = 20  $\mu$ m. (C) Real-time qPCR analysis of *Pard6b* expression in *Tfap2c*-inducible ESCs. (D) Immunofluorescence analysis of PARD6B in *Tfap2c*-inducible ESCs. Nuclei were counterstained with DAPI. Scale bars = 20  $\mu$ m.

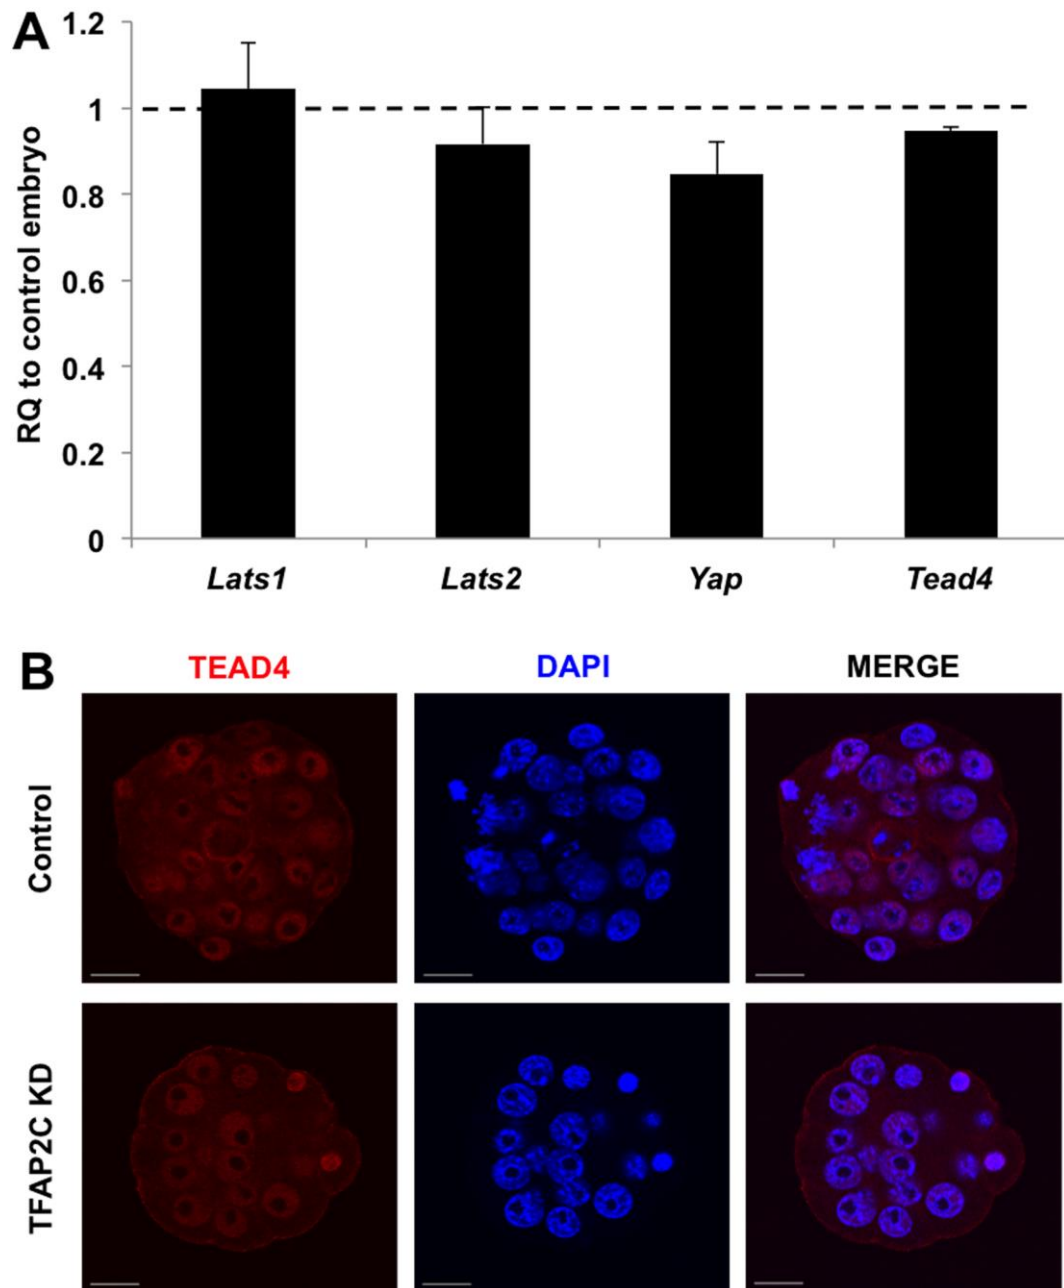

**Fig. S4. TFAP2C does not directly regulate the expression of key HIPPO signaling pathway members.**

(A) Real-time qPCR analysis of *Lats1*, *Lats2*, *Yap*, *Tead4* transcripts in TFAP2C KD morula. Expression is relative to control embryos. RQ, relative quantification. (B) Immunofluorescence analysis of TEAD4 in TFAP2C KD and control morulae. Nuclei were counterstained with DAPI. Scale bar = 20  $\mu$ m. A total of two biological replicates were performed using 24-28 embryos per group.

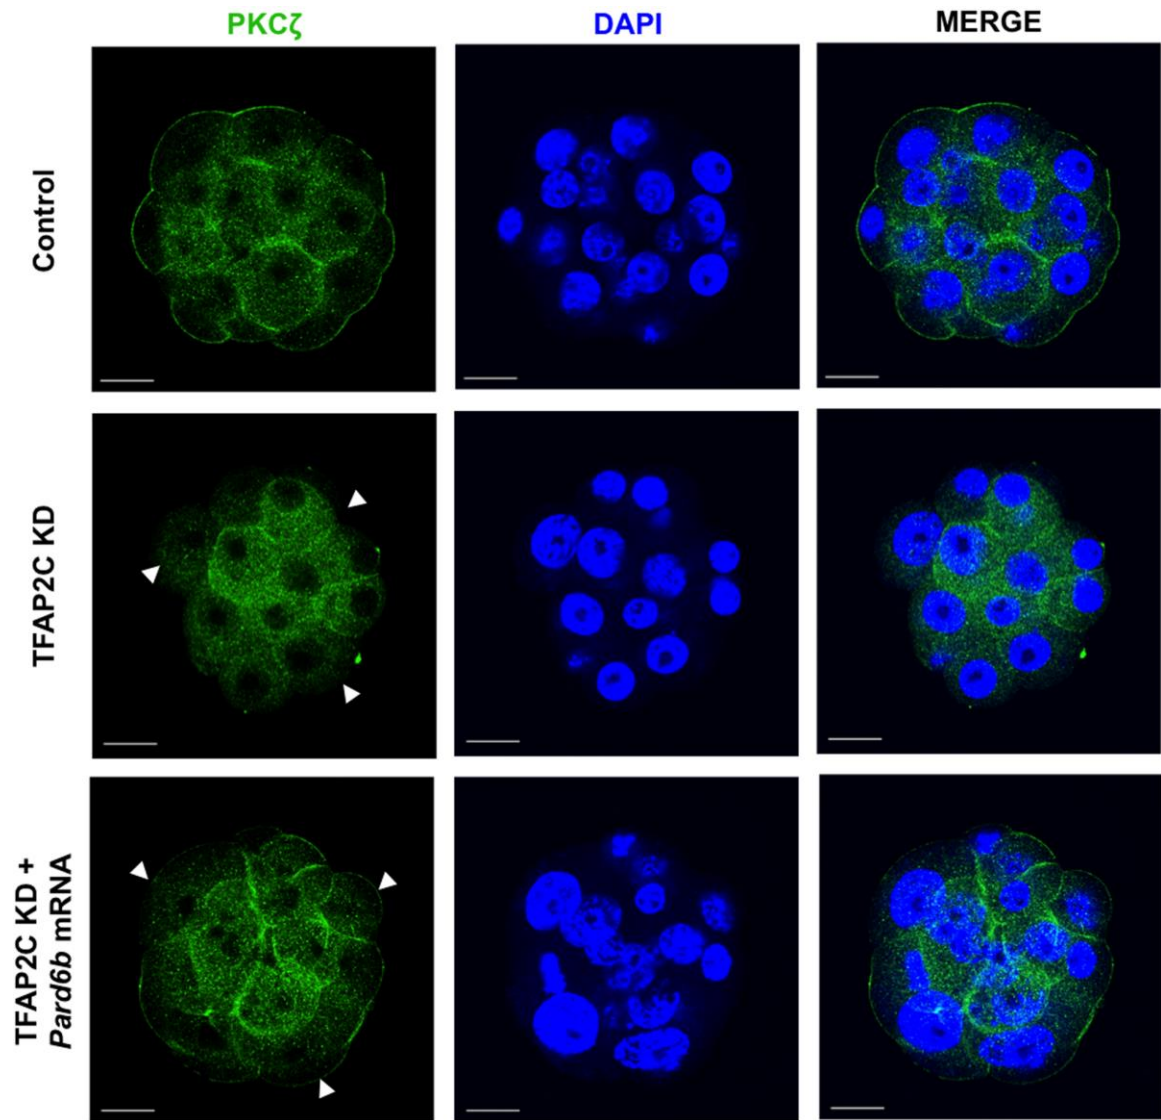

**Fig. S5. PARD6B rescue can restore PKC $\zeta$  localization to the apical region in TFAP2C KD embryos.**

Immunofluorescence analysis of PKC $\zeta$  localization in TFAP2C KD, PARD6B rescued TFAP2C KD, and control morulae. Nuclei were counterstained with DAPI. Scale bar = 20  $\mu$ m. A total of two biological replicates were performed using 20-24 embryos per group.



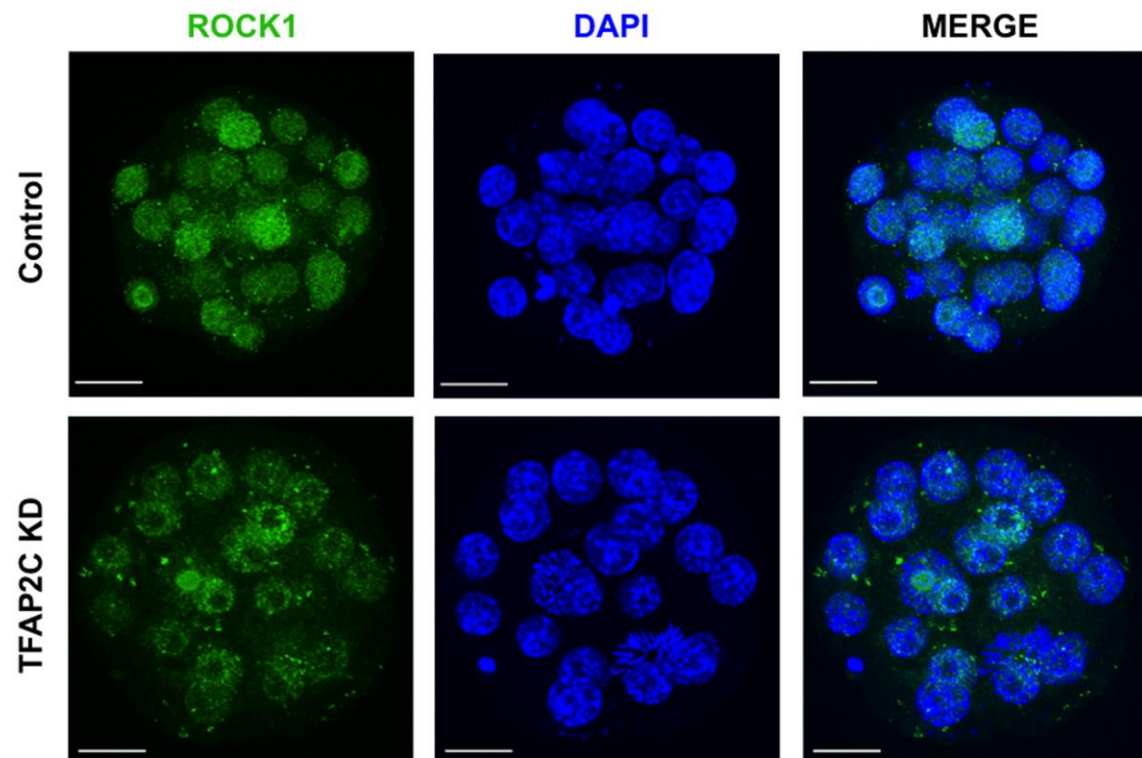

**Fig. S6. ROCK1 protein is reduced in TFAP2C KD morulae.**

Immunofluorescence analysis of ROCK1 in TFAP2C KD and control morulae. Nuclei were counterstained with DAPI. Scale bar = 20  $\mu$ m. A total of two biological replicates were performed.

**Table S1. Primers and probes****SYBR-Green primers for quantitative RT-PCR analysis:**

| Species | Gene         | Forward (5'-3')       | Reverse (5'-3')        |
|---------|--------------|-----------------------|------------------------|
| Mouse   | <i>Lats1</i> | TTTGCAGGCTGCTGGCTTTG  | AGACATCTGCTCTCGACGAG   |
| Mouse   | <i>Lats2</i> | TGCGAGTCATCAAGCAGACC  | ACTTGGCTCTACTGCTGTGC   |
| Mouse   | <i>Yap</i>   | GTCCTCCTTTGAGATCCCTGA | TGTTGTTGCTGATCGTTGTGAT |

**TaqMan probes for quantitative RT-PCR analysis:**

| Species | Gene          | Catalog number |
|---------|---------------|----------------|
| Mouse   | <i>Tfap2c</i> | Mm00493473-m1  |
| Mouse   | <i>Cdx2</i>   | Mm01212280-m1  |
| Mouse   | <i>Rock1</i>  | Mm00485745-m1  |
| Mouse   | <i>Rock2</i>  | Mm01270843-m1  |
| Mouse   | <i>Limk1</i>  | Mm00440191-m1  |
| Mouse   | <i>Limk2</i>  | Mm01187665-m1  |
| Mouse   | <i>Ubf</i>    | Mm00456972-m2  |

**Primers for quantitative ChIP analysis:**

| Species | Genomic location                                 | Primer sequences                                                            |
|---------|--------------------------------------------------|-----------------------------------------------------------------------------|
| Mouse   | <i>Cdx2</i> intron 1<br>TFAP2C proximal<br>motif | Forward: 5'-TCACAGCGACCTCTCATCTG-3'<br>Reverse: 5'-AGGGGGAGGAGAACCTCAG-3'   |
| Mouse   | <i>Cdx2</i> intron 1<br>TFAP2C distal<br>motif   | Forward: 5'-ATCTAAGGGGTGGGAGTTGC-3'<br>Reverse: 5'-TGGTTTGCAAAGGTTTTTACC-3' |

**Table S2. Antibodies**

| <b>Primary Antibody</b> | <b>Species</b>        | <b>Vendor</b>             | <b>Cat.no. and Dilution</b> |
|-------------------------|-----------------------|---------------------------|-----------------------------|
| TFAP2C                  | Rabbit                | Santa Cruz Biotechnology  | sc-8977 (1:100)             |
| CDX2                    | Mouse                 | Biogenex                  | AM-392 (1:25)               |
| PAR6B                   | Rabbit                | Santa Cruz Biotechnology  | sc-67393 (1:100)            |
| PKC $\zeta$             | Mouse                 | Santa Cruz Biotechnology  | sc-17781 (1:100)            |
| pERM                    | Rabbit                | Cell Signaling Technology | 3149 (1:100)                |
| YAP                     | Mouse                 | Abnova                    | H00010413-M01 (1:100)       |
| pYAP                    | Rabbit                | Cell Signaling Technology | 4911 (1:100)                |
| TEAD4                   | Mouse                 | Abcam                     | ab58310 (1:100)             |
| GATA3                   | Mouse                 | BD Pharmingen             | 558686 (1:100)              |
| F-actin                 | Amanita<br>phalloides | Molecular Probes          | A12380 (1:40)               |
| Normal control IgG      | Rabbit                | Millipore                 | 12-370 (1:100)              |

| <b>Secondary Antibody</b>       | <b>Species</b> | <b>Vendor</b>     | <b>Cat.no.</b>  |
|---------------------------------|----------------|-------------------|-----------------|
| Alexa Fluor 488 anti-mouse IgG  | Goat           | Molecular Probes  | A11001 (1:2000) |
| Alexa Fluor 488 anti-mouse IgG  | Chicken        | Molecular Probes  | A21200 (1:2000) |
| Alexa Fluor 488 anti-rabbit IgG | Goat           | Molecular Probes  | A11008 (1:2000) |
| Alexa Fluor 594 anti-mouse IgG  | Donkey         | Molecular Probes  | A21207 (1:2000) |
| Anti-rabbit IgG-HRP             | Goat           | Thermo Scientific | 31460 (1:5000)  |
